# Supplementary material
Source: bioRxiv or medRxiv preprint supplement (https://www.biorxiv.org/highwire/filestream/67774/field_highwire_adjunct_files/8/157404-2.pdf)
Supplement: Supplementary file [file 157404-2.pdf]

# Figure S2

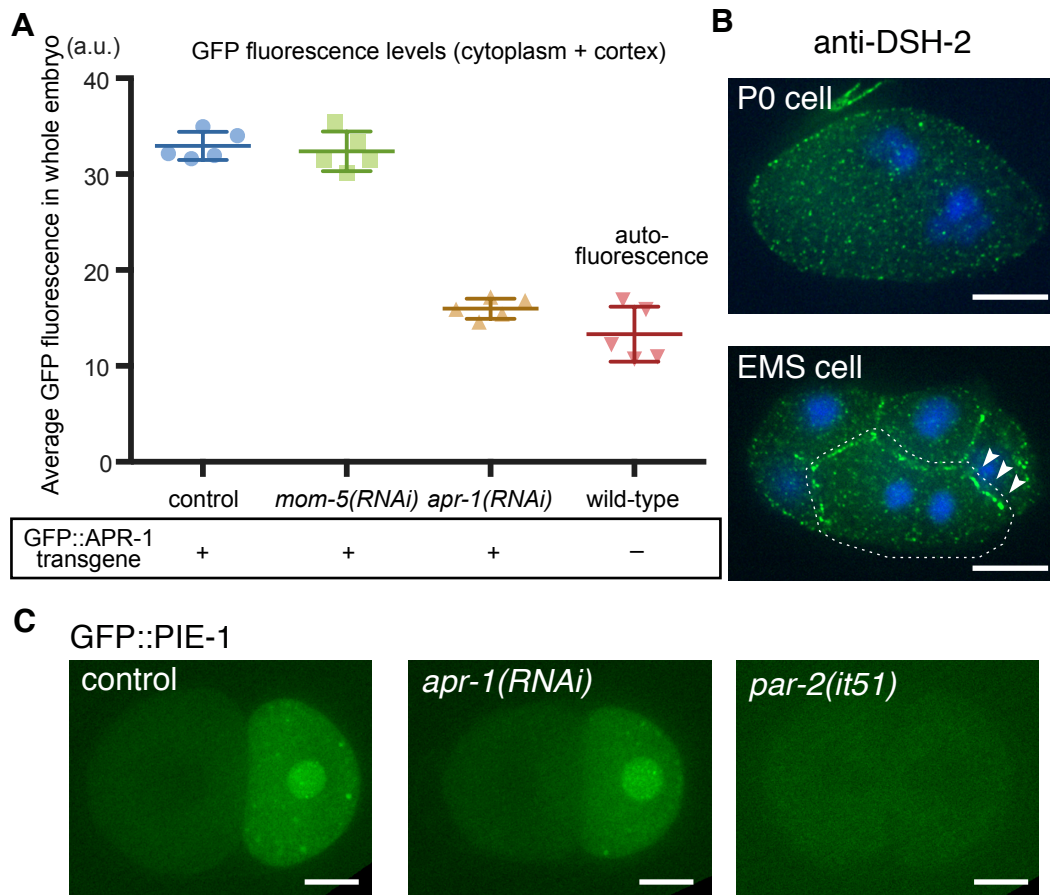

## Figure S2. Roles of Wnt signaling in P0 cell division.

(A) APR-1 level after RNAi experiments. GFP fluorescence intensity per area of the whole embryo including the cell cortex and cytoplasm were measured and shown. Signal in wild-type indicates auto-fluorescence. (B) Immunofluorescence images of the DSH-2 protein during P0 and EMS cell division. Blue is DAPI staining. In EMS, the DSH-2 protein is enriched at the cell boundary between EMS and P2 (arrowheads) while no asymmetry was observed in P0. (C) Localizations of the cell fate determinant GFP::PIE-1 in the indicated genotypes. Control and *apr-1(RNAi)* shows PIE-1 enrichment in the posterior blastomere P1. In the *par-2* mutant, PIE-1 asymmetry was lost. Scale bars indicate 10  $\mu\text{m}$ .
